# Supplementary material for: One pot synthesis of CeO2nanoparticles on a carbon surface for the practical determination of paracetamol content in real samples
Source: Royal Society of Chemistry journal article supplement (doi:10.1039/c6ra23114d), 2016-01-01
Supplement: c6ra23114d1.pdf [file c6ra23114d1.pdf]

## **One pot synthesis of CeO<sub>2</sub> nanoparticles on the carbon surface for practical determination of paracetamol in real sample†**

Mani Sivakumar, Mani Sakthivel, Shen-Ming Chen\*

\*Electroanalysis and Bioelectrochemistry Lab, Department of Chemical Engineering and Biotechnology,

National Taipei University of Technology, Taipei 10608, Taiwan.

Tel: (886)-2-27017147; Fax: (886)-2-27025238

E-mail: [smchen78@ms15.hinet.net](mailto:smchen78@ms15.hinet.net) (S.M. Chen)

\*Corresponding author: Shen-Ming Chen

Tel: (886)-2-27017147; Fax: (886)-2-27025238

E-mail: [smchen78@ms15.hinet.net](mailto:smchen78@ms15.hinet.net) (S.M. Chen)

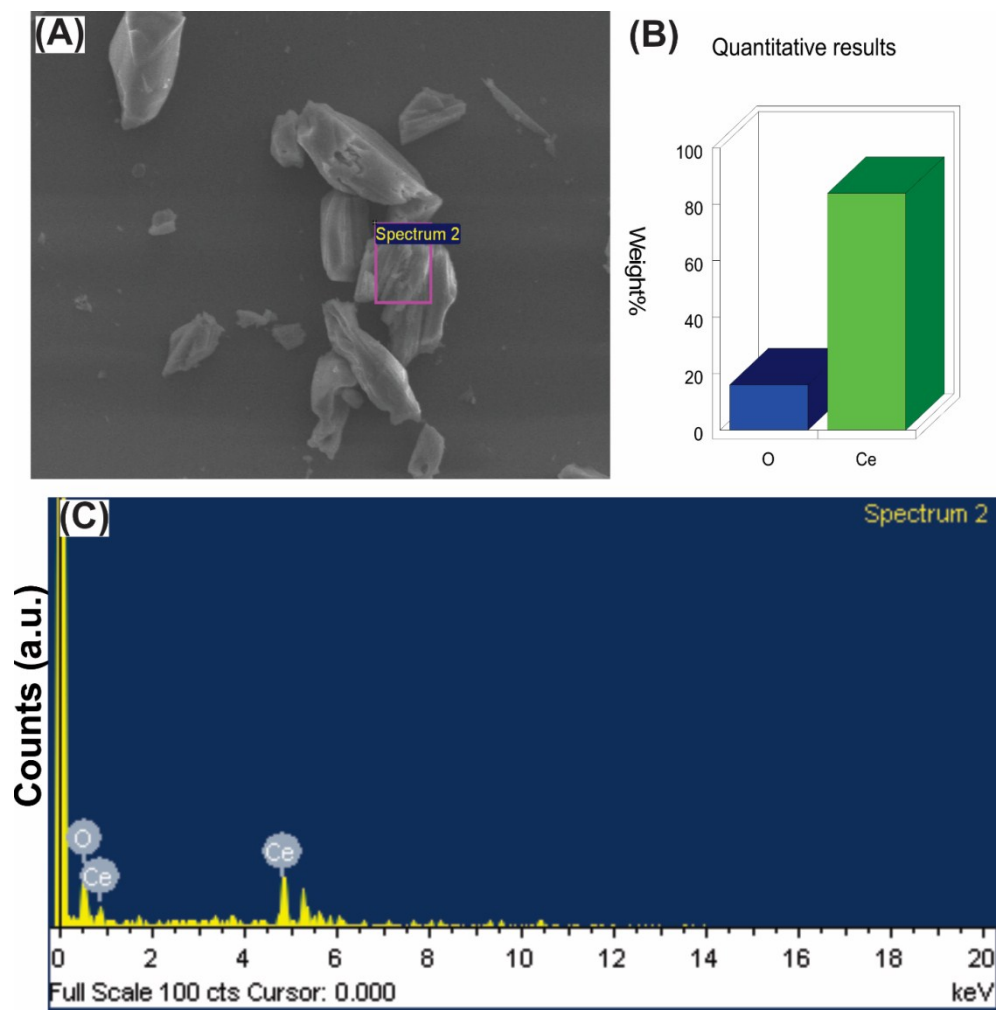

Fig. S1 (A-C) EDX spectra for  $\text{CeO}_2$ .

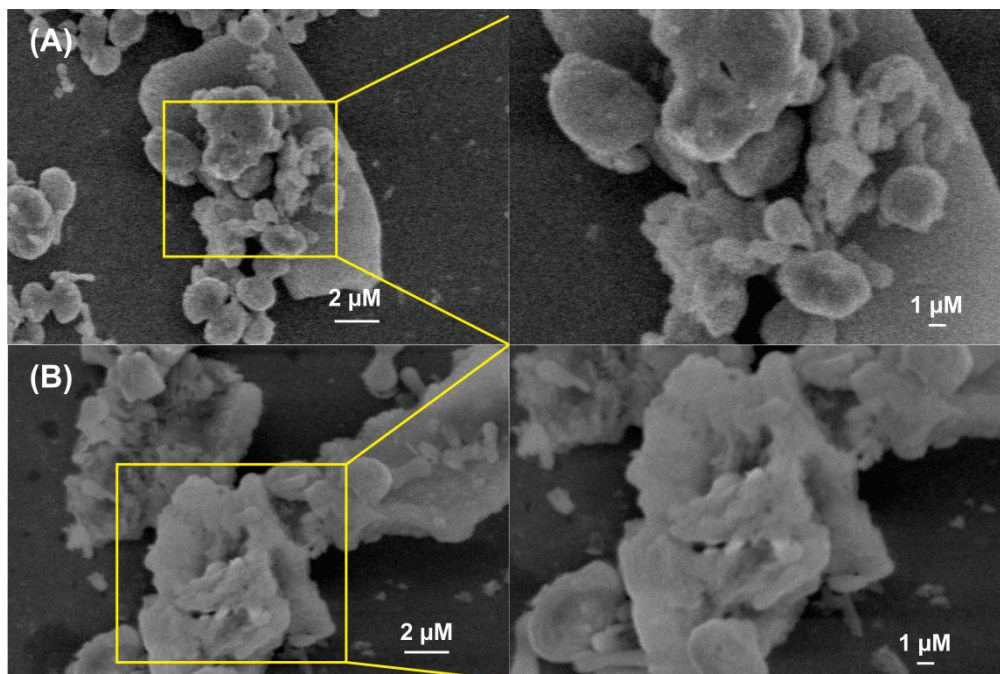

**Fig. S2** (A, B) SEM image for low and high concentration of cerium in CeO<sub>2</sub>-C with different magnification.

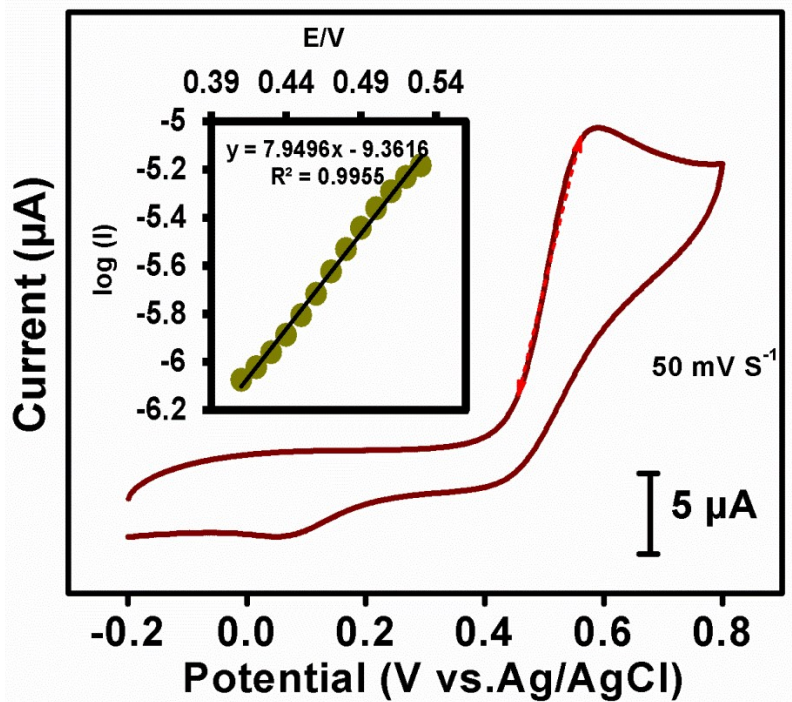

**Fig. S3** CV profile of Tafel plot (inset) for CeO<sub>2</sub>-C at scan rate of 50 mV s<sup>-1</sup> in the presence of 196 µM PA with buffer solution of 0.1 M PBS (pH 7.2).

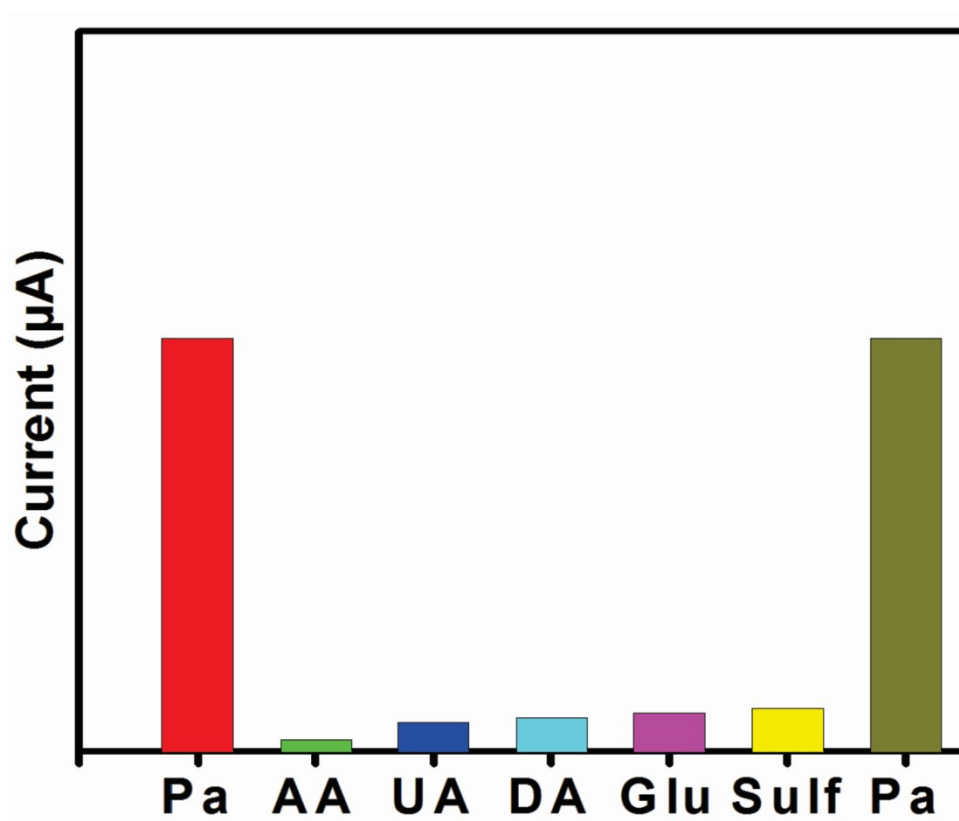

**Fig. S4** Interference studies for CeO<sub>2</sub>-C modified GCE with various interfering agents in the presence of PA.
